# Supplementary material for: Fibrogenic Activity of MECP2 Is Regulated by Phosphorylation in Hepatic Stellate Cells
Source: PubMed Central journal article supplement (PMC6853276; doi:10.1053/j.gastro.2019.07.029), 2019-11
Supplement: mmc1.pdf [file mmc1.pdf]

**Supplementary Table 1. Differentially Expressed upregulated genes that passed the filtering (Fold Change  $\geq 2.0$ , p-value  $\leq 0.05$ )**

| Accession Number | Gene Symbol | FC   | p-val | length | Ch    | S | Start     | End       |
|------------------|-------------|------|-------|--------|-------|---|-----------|-----------|
| NM_001110146     | Prg4        | 5.82 | 0.008 | 1884   | chr1  | - | 152296541 | 152313295 |
| NM_198112        | Ostn        | 5.59 | 0.039 | 1268   | chr16 | + | 27307726  | 27351295  |
| NM_052992        | Fxyd1       | 5.48 | 0.002 | 639    | chr7  | - | 31836696  | 31840675  |
| NM_029993        | Mlana       | 5.00 | 0.037 | 461    | chr19 | + | 29772430  | 29782796  |
| NM_010738        | Ly6a        | 4.95 | 0.013 | 842    | chr15 | - | 74825306  | 74828318  |
| NM_031176        | Tnxb        | 4.56 | 0.014 | 9569   | chr17 | + | 34807479  | 34856760  |
| NM_008510        | Xcl1        | 4.43 | 0.039 | 502    | chr1  | - | 166861778 | 166865641 |
| NM_001099217     | Ly6c2       | 4.41 | 0.025 | 875    | chr15 | - | 74938590  | 74942379  |
| NM_001014422     | Abi3bp      | 4.33 | 0.018 | 4454   | chr16 | + | 56477958  | 56690248  |
| NM_001039647     | Gbp11       | 4.02 | 0.045 | 2723   | chr5  | - | 105752044 | 105775491 |
| NM_020498        | Ly6i        | 3.97 | 0.032 | 878    | chr15 | - | 74810241  | 74813860  |
| NM_178790        | Abi3bp      | 3.91 | 0.033 | 4394   | chr16 | + | 56477958  | 56690248  |
| NM_013606        | Mx2         | 3.90 | 0.038 | 2424   | chr16 | + | 97757689  | 97782506  |
| NM_028979        | Cyp2j9      | 3.74 | 0.021 | 1944   | chr4  | - | 96235119  | 96258176  |
| NM_009115        | S100b       | 3.72 | 0.005 | 1676   | chr10 | + | 75716580  | 75724064  |
| NM_009155        | Sepp1       | 3.33 | 0.010 | 2030   | chr15 | + | 3220976   | 3230508   |
| NM_001033373     | Cdk15       | 3.20 | 0.024 | 1477   | chr1  | + | 59313750  | 59409213  |
| NM_001014399     | Abi3bp      | 3.17 | 0.039 | 3884   | chr16 | + | 56477958  | 56690248  |
| NM_001161374     | F8          | 3.13 | 0.028 | 7306   | chrX  | - | 72418055  | 72625380  |
| NM_019823        | Cyp2d22     | 3.10 | 0.019 | 2782   | chr15 | - | 82200956  | 82210690  |
| NM_146260        | Tmie        | 3.03 | 0.041 | 2437   | chr9  | - | 110768549 | 110782587 |
| NM_009129        | Scg2        | 2.97 | 0.023 | 2485   | chr1  | - | 79431243  | 79436665  |
| NM_008489        | Lbp         | 2.97 | 0.039 | 2528   | chr2  | + | 158132228 | 158158588 |
| NM_207267        | Tmsb15l     | 2.92 | 0.038 | 808    | chrX  | - | 133489528 | 133511390 |
| NM_001163557     | Ppfibp2     | 2.83 | 0.028 | 3850   | chr7  | + | 114750357 | 114892097 |
| NM_172951        | Sntg2       | 2.79 | 0.010 | 2337   | chr12 | - | 30859421  | 31058240  |
| NM_008288        | Hsd11b1     | 2.79 | 0.000 | 1381   | chr1  | - | 195047834 | 195090239 |
| NM_001001446     | Cyp2c44     | 2.76 | 0.043 | 1964   | chr19 | - | 44079511  | 44103737  |
| NM_001102409     | Kng2        | 2.76 | 0.042 | 1612   | chr16 | - | 22985924  | 23029174  |
| NM_001122635     | Cdhr4       | 2.73 | 0.028 | 1135   | chr9  | + | 107897371 | 107902011 |
| NM_001126491     | Gm14459     | 2.72 | 0.043 | 540    | chrX  | - | 8091177   | 8102080   |
| NM_013755        | Gyg         | 2.70 | 0.048 | 1739   | chr3  | - | 20021969  | 20054995  |
| NM_025727        | Klhl10      | 2.69 | 0.005 | 2012   | chr11 | + | 100303237 | 100318338 |
| NM_181728        | Art3        | 2.67 | 0.047 | 1578   | chr5  | + | 92760866  | 92843653  |
| NM_001160386     | Dnahc7b     | 2.66 | 0.018 | 12318  | chr1  | + | 46123582  | 46430395  |
| NM_172524        | Nipal4      | 2.59 | 0.004 | 3295   | chr11 | - | 45961656  | 45979861  |
| NM_008631        | Mt4         | 2.57 | 0.042 | 392    | chr8  | + | 96661103  | 96662931  |
| NM_030150        | Dhx58       | 2.54 | 0.026 | 2427   | chr11 | - | 100556197 | 100565585 |
| NM_001142706     | Cfb         | 2.51 | 0.014 | 2763   | chr17 | - | 34993318  | 34999459  |
| NM_001200041     | Gm1078      | 2.50 | 0.022 | 3152   | chr7  | - | 4916861   | 4922563   |
| NM_007797        | Ctla2b      | 2.50 | 0.032 | 856    | chr13 | - | 60996711  | 60998808  |
| NM_207268        | Ccdc87      | 2.45 | 0.010 | 3163   | chr19 | + | 4839365   | 4842528   |
| NM_001011872     | Olf1034     | 2.45 | 0.020 | 1023   | chr2  | + | 85886600  | 85887623  |
| NM_009170        | Shh         | 2.44 | 0.047 | 2727   | chr5  | - | 28783379  | 28793641  |
| NM_011430        | Sncg        | 2.44 | 0.036 | 757    | chr14 | - | 35183459  | 35187855  |
| NM_010060        | Dnahc11     | 2.43 | 0.030 | 14072  | chr12 | - | 119116454 | 119437516 |
| NM_024264        | Cyp27a1     | 2.43 | 0.043 | 1890   | chr1  | + | 74760147  | 74784464  |
| NM_001163569     | Kif9        | 2.42 | 0.028 | 3162   | chr9  | + | 110379497 | 110426944 |
| NM_146630        | Olf123      | 2.41 | 0.023 | 930    | chr17 | + | 37932390  | 37933320  |
| NM_001172055     | Bdh2        | 2.41 | 0.013 | 1172   | chr3  | + | 134944184 | 134967389 |

|              |               |      |       |       |       |   |           |           |
|--------------|---------------|------|-------|-------|-------|---|-----------|-----------|
| NM_018738    | Igtp          | 2.40 | 0.033 | 2064  | chr11 | + | 58013057  | 58021094  |
| NM_139269    | Pla2g16       | 2.40 | 0.031 | 3523  | chr19 | + | 7631948   | 7663035   |
| NM_146015    | Efemp1        | 2.40 | 0.006 | 2036  | chr11 | + | 28753204  | 28826743  |
| NM_027040    | 1700007K13Rik | 2.39 | 0.003 | 833   | chr2  | - | 28317520  | 28321844  |
| NM_053135    | Pcdhb10       | 2.39 | 0.047 | 2842  | chr18 | + | 37571327  | 37574168  |
| NM_177216    | Cyb5r2        | 2.38 | 0.047 | 2688  | chr7  | - | 114891968 | 114901510 |
| NM_013555    | Hoxd9         | 2.38 | 0.021 | 2153  | chr2  | + | 74535819  | 74538265  |
| NM_028169    | Fam71e1       | 2.37 | 0.041 | 849   | chr7  | + | 51751957  | 51756504  |
| NM_008967    | Ptgir         | 2.35 | 0.010 | 3334  | chr7  | + | 17491838  | 17496254  |
| NM_001139519 | Zbp1          | 2.34 | 0.004 | 781   | chr2  | - | 173039236 | 173044423 |
| NM_028623    | Cst6          | 2.34 | 0.004 | 3951  | chr19 | - | 5344704   | 5349574   |
| NM_010358    | Gstm1         | 2.33 | 0.010 | 1310  | chr3  | - | 107815167 | 107820891 |
| NM_153789    | Mylip         | 2.33 | 0.011 | 2983  | chr13 | + | 45485110  | 45507309  |
| NM_001032298 | Bglap2        | 2.31 | 0.017 | 471   | chr3  | - | 88181657  | 88182621  |
| NM_021394    | Zbp1          | 2.30 | 0.004 | 1988  | chr2  | - | 173032113 | 173044423 |
| NM_025759    | Speer4d       | 2.30 | 0.029 | 1159  | chr5  | + | 15124916  | 15129682  |
| NM_008198    | Cfb           | 2.29 | 0.012 | 2767  | chr17 | - | 34993318  | 34999459  |
| NM_178404    | Zc3h6         | 2.29 | 0.014 | 4916  | chr2  | + | 128793137 | 128844299 |
| NM_026880    | Pink1         | 2.26 | 0.029 | 2367  | chr4  | - | 137869324 | 137882211 |
| NM_008486    | Anpep         | 2.26 | 0.041 | 3439  | chr7  | - | 86966688  | 86987238  |
| NM_001042779 | Sema3b        | 2.25 | 0.015 | 3305  | chr9  | - | 107500445 | 107511572 |
| NM_001012322 | Sctr          | 2.23 | 0.020 | 1939  | chr1  | + | 121903556 | 121960109 |
| NM_145467    | Itgbl1        | 2.22 | 0.000 | 2357  | chr14 | + | 124059361 | 124373301 |
| NM_001039122 | Defb25        | 2.21 | 0.023 | 297   | chr2  | - | 152448091 | 152448789 |
| NM_008107    | Gdf1          | 2.21 | 0.041 | 1419  | chr8  | + | 72853663  | 72855487  |
| NM_207657    | 5031410I06Rik | 2.21 | 0.031 | 2947  | chr5  | - | 26425207  | 26431854  |
| NM_013792    | Naglu         | 2.20 | 0.014 | 2504  | chr11 | + | 100931407 | 100938985 |
| NM_010359    | Gstm3         | 2.20 | 0.018 | 1202  | chr3  | - | 107766613 | 107772076 |
| NM_175692    | Snhg11        | 2.20 | 0.023 | 5864  | chr2  | + | 158201373 | 158211881 |
| NM_027153    | Pir           | 2.20 | 0.002 | 1601  | chrX  | + | 160707362 | 160810945 |
| NM_001007570 | Slc25a42      | 2.19 | 0.044 | 3181  | chr8  | - | 72708238  | 72736180  |
| NM_001145926 | C530028O21Rik | 2.19 | 0.037 | 2091  | chr6  | + | 124948627 | 124953117 |
| NM_011261    | Reln          | 2.18 | 0.045 | 11702 | chr5  | - | 21390271  | 21850523  |
| NM_025496    | Cdrt4         | 2.18 | 0.048 | 723   | chr11 | + | 62764694  | 62806597  |
| NM_026599    | Cgnl1         | 2.16 | 0.005 | 6754  | chr9  | - | 71474315  | 71619409  |
| NM_022880    | Slc29a1       | 2.16 | 0.001 | 2047  | chr17 | - | 45722148  | 45729342  |
| NM_001101475 | F830016B08Rik | 2.15 | 0.035 | 3297  | chr18 | + | 60453033  | 60462670  |
| NM_012044    | Pla2g2e       | 2.12 | 0.005 | 851   | chr4  | + | 138433856 | 138438729 |
| NM_011322    | Scn1b         | 2.11 | 0.036 | 1568  | chr7  | - | 31901542  | 31911964  |
| NM_175486    | 6430571L13Rik | 2.11 | 0.004 | 2552  | chr9  | + | 107242970 | 107252014 |
| NM_028181    | Ccpg1         | 2.11 | 0.037 | 2689  | chr9  | + | 72833357  | 72863806  |
| NM_001134299 | Gm10220       | 2.11 | 0.023 | 2984  | chr5  | - | 26441303  | 26447965  |
| NM_174857    | Mamdc2        | 2.10 | 0.041 | 3338  | chr19 | - | 23377098  | 23522812  |
| NM_010140    | Epha3         | 2.10 | 0.011 | 3978  | chr16 | - | 63545043  | 63863983  |
| NM_175030    | Tctex1d4      | 2.08 | 0.033 | 982   | chr4  | + | 116799417 | 116801335 |
| NM_001114328 | Ccpg1         | 2.08 | 0.047 | 2966  | chr9  | + | 72833357  | 72861745  |
| NM_001081131 | Dhtkd1        | 2.08 | 0.002 | 3535  | chr2  | - | 5819105   | 5863838   |
| NM_011909    | Usp18         | 2.07 | 0.046 | 1778  | chr6  | + | 121195923 | 121220935 |
| NM_009250    | Serpini1      | 2.07 | 0.046 | 3133  | chr3  | + | 75361454  | 75446445  |
| NM_001136088 | Sh3bp2        | 2.07 | 0.018 | 2957  | chr5  | + | 34892336  | 34906288  |
| NM_029376    | Speer4a       | 2.07 | 0.036 | 1503  | chr5  | - | 26360809  | 26366045  |
| NM_001004159 | Clec4b2       | 2.06 | 0.035 | 1044  | chr6  | + | 123123040 | 123154689 |
| NM_025658    | Ms4a4d        | 2.06 | 0.026 | 1480  | chr19 | + | 11611338  | 11632956  |
| NM_001037713 | Xaf1          | 2.06 | 0.029 | 2621  | chr11 | + | 72115130  | 72127235  |

|              |               |      |       |      |       |   |           |           |
|--------------|---------------|------|-------|------|-------|---|-----------|-----------|
| NM_010778    | Cd46          | 2.06 | 0.003 | 1213 | chr1  | - | 196868093 | 196918442 |
| NM_181344    | C1rl          | 2.06 | 0.010 | 3010 | chr6  | + | 124443130 | 124460661 |
| NM_028561    | Speer4b       | 2.06 | 0.027 | 1977 | chr5  | - | 27822348  | 27827932  |
| NM_207624    | Ace           | 2.06 | 0.014 | 4885 | chr11 | + | 105829260 | 105851259 |
| NM_030738    | Vmn1r65       | 2.05 | 0.006 | 2685 | chr7  | - | 5959351   | 5962612   |
| NM_025711    | Aspn          | 2.05 | 0.008 | 2362 | chr13 | + | 49639811  | 49662931  |
| NM_027062    | C8g           | 2.04 | 0.035 | 1063 | chr2  | - | 25354175  | 25356026  |
| NM_001081351 | A430107O13Rik | 2.04 | 0.039 | 4898 | chr6  | + | 21935909  | 22205606  |
| NM_027835    | Ifih1         | 2.04 | 0.011 | 5519 | chr2  | - | 62433849  | 62484312  |
| NM_007796    | Ctla2a        | 2.04 | 0.030 | 1373 | chr13 | - | 61035515  | 61037986  |
| NM_145153    | Oas1f         | 2.03 | 0.024 | 1480 | chr5  | + | 121297375 | 121307995 |
| NM_021486    | Bcmo1         | 2.03 | 0.034 | 2327 | chr8  | + | 119619764 | 119657620 |
| NM_019963    | Stat2         | 2.03 | 0.024 | 4402 | chr10 | + | 127707631 | 127729905 |
| NM_144938    | C1s           | 2.03 | 0.006 | 2947 | chr6  | - | 124480361 | 124492339 |
| NM_001113198 | Mitf          | 2.03 | 0.014 | 4890 | chr6  | + | 97757051  | 97971352  |
| NM_148942    | Serpib6c      | 2.02 | 0.020 | 1390 | chr13 | - | 33971684  | 33997577  |
| NM_020561    | Smpdl3a       | 2.01 | 0.006 | 1791 | chr10 | + | 57514349  | 57531636  |
| NM_010630    | Kifc2         | 2.01 | 0.045 | 3143 | chr15 | + | 76491070  | 76498626  |
| NM_001040112 | Arap1         | 2.01 | 0.037 | 5314 | chr7  | + | 108526635 | 108561100 |
| NM_008626    | Mrc2          | 2.00 | 0.037 | 5801 | chr11 | + | 105153959 | 105212459 |
