# Supplementary material for: Fibrogenic Activity of MECP2 Is Regulated by Phosphorylation in Hepatic Stellate Cells
Source: PubMed Central journal article supplement (PMC6853276; doi:10.1053/j.gastro.2019.07.029), 2019-11
Supplement: mmc2.pdf [file mmc2.pdf]

**Supplementary Table 2. Differentially Expressed downregulated genes that passed the filtering (Fold Change  $\geq$  2.0, p-value  $\leq$  0.05)**

| Accession number | Gene Symbol   | FC   | p-val  | length | Chr   | S | Start     | End       |
|------------------|---------------|------|--------|--------|-------|---|-----------|-----------|
| NM_009491        | Vmn2r10       | 9.16 | 0.0002 | 2544   | chr5  | - | 109424557 | 109435455 |
| NM_011477        | Sprr2k        | 8.65 | 0.0340 | 639    | chr3  | + | 92236503  | 92237849  |
| NM_001104623     | Vmn2r12       | 7.93 | 0.0024 | 2496   | chr5  | - | 109514867 | 109526883 |
| NM_008216        | Has2          | 6.48 | 0.0414 | 4262   | chr15 | - | 56497181  | 56526101  |
| NM_008522        | Ltf           | 5.40 | 0.0441 | 2742   | chr9  | + | 110921795 | 110945270 |
| NM_001082546     | BC100530      | 5.06 | 0.0219 | 453    | chr16 | - | 36359467  | 36367656  |
| NM_153786        | Vgll2         | 4.68 | 0.0308 | 1483   | chr10 | + | 51742491  | 51748277  |
| NM_022879        | Myl7          | 4.49 | 0.0161 | 599    | chr11 | - | 5796639   | 5798785   |
| NM_007424        | Acan          | 4.33 | 0.0134 | 7355   | chr7  | + | 86198368  | 86259985  |
| NM_011613        | Tnfsf11       | 3.95 | 0.0498 | 2243   | chr14 | - | 78677252  | 78707850  |
| NM_020596        | Egr4          | 3.91 | 0.0414 | 2100   | chr6  | - | 85461115  | 85463536  |
| NM_001167567     | Vmn1r186      | 3.73 | 0.0203 | 903    | chr7  | + | 5626923   | 5627826   |
| NM_001104624     | Vmn2r13       | 3.70 | 0.0089 | 2496   | chr5  | - | 109585086 | 109621126 |
| NM_177752        | Eme1          | 3.54 | 0.0475 | 2228   | chr11 | - | 94506315  | 94515068  |
| NM_008566        | Mcm5          | 3.38 | 0.0155 | 3422   | chr8  | + | 77633426  | 77652338  |
| NM_001081099     | 2610002D18Rik | 3.34 | 0.0472 | 1270   | chr4  | + | 134066913 | 134079837 |
| NM_153404        | Liph          | 3.33 | 0.0132 | 2050   | chr16 | - | 21955463  | 21995523  |
| NM_016777        | Nasp          | 3.31 | 0.0439 | 3087   | chr4  | - | 116273656 | 116300556 |
| NM_009523        | Wnt4          | 3.28 | 0.0402 | 1101   | chr4  | + | 136833549 | 136852694 |
| NM_009828        | Ccna2         | 3.21 | 0.0295 | 2827   | chr3  | - | 36463786  | 36470918  |
| NM_011851        | Nt5e          | 3.16 | 0.0479 | 3580   | chr9  | + | 88222446  | 88266927  |
| NM_001199955     | Ankrd60       | 3.16 | 0.0013 | 598    | chr2  | - | 173397890 | 173403842 |
| NM_001039155     | Triobp        | 3.14 | 0.0171 | 3807   | chr15 | + | 78778153  | 78799272  |
| NM_001033149     | Ttc9          | 3.12 | 0.0162 | 2042   | chr12 | + | 82732355  | 82765928  |
| NM_010043        | Des           | 3.10 | 0.0408 | 2162   | chr1  | + | 75356918  | 75364290  |
| NM_001195298     | Kifc1         | 3.05 | 0.0010 | 2330   | chr17 | - | 34012610  | 34027578  |
| NM_146298        | Olfr746       | 3.01 | 0.0162 | 945    | chr14 | + | 51272913  | 51273858  |
| NM_001085524     | Gm5634        | 3.01 | 0.0489 | 842    | chrX  | - | 8539259   | 8540101   |
| NM_027290        | Mcm10         | 2.96 | 0.0377 | 3510   | chr2  | - | 4911769   | 4933837   |
| NM_027411        | Ccdc99        | 2.96 | 0.0203 | 2526   | chr11 | - | 34622686  | 34647143  |
| NM_009922        | Cnn1          | 2.94 | 0.0276 | 1987   | chr9  | + | 21903696  | 21913665  |
| NM_024245        | Kif23         | 2.94 | 0.0296 | 3439   | chr9  | - | 61765084  | 61794606  |
| NM_008563        | Mcm3          | 2.93 | 0.0098 | 2886   | chr1  | - | 20793094  | 20810294  |
| NM_009104        | Rrm2          | 2.85 | 0.0441 | 2199   | chr12 | + | 25393118  | 25399011  |
| NM_010615        | Kif11         | 2.85 | 0.0315 | 4850   | chr19 | + | 37450892  | 37496349  |
| NM_172453        | Pif1          | 2.80 | 0.0134 | 3680   | chr9  | + | 65435011  | 65443769  |
| NM_053173        | Kifc5b        | 2.79 | 0.0009 | 2627   | chr17 | + | 27054035  | 27069524  |
| NM_016958        | Krt14         | 2.78 | 0.0286 | 1680   | chr11 | - | 100064475 | 100068824 |
| NM_008652        | Mybl2         | 2.76 | 0.0325 | 3702   | chr2  | + | 162880370 | 162910423 |
| NM_029835        | 5730590G19Rik | 2.75 | 0.0445 | 7213   | chr7  | + | 86805081  | 86843031  |
| NM_001164253     | Tpm1          | 2.74 | 0.0405 | 1675   | chr9  | - | 66870399  | 66891678  |
| NM_026785        | Ube2c         | 2.72 | 0.0311 | 931    | chr2  | + | 164595428 | 164598402 |
| NM_029937        | Nup210l       | 2.71 | 0.0025 | 5681   | chr3  | + | 89908053  | 90015939  |
| NM_022724        | Suv39h2       | 2.71 | 0.0439 | 4282   | chr2  | - | 3373086   | 3392258   |
| NM_145150        | Prc1          | 2.69 | 0.0315 | 3035   | chr7  | + | 87439350  | 87461145  |
| NM_009132        | Scin          | 2.68 | 0.0012 | 2708   | chr12 | - | 40786357  | 40860815  |
| NM_009575        | Zic3          | 2.65 | 0.0046 | 4035   | chrX  | + | 55283804  | 55289807  |
| NM_008567        | Mcm6          | 2.64 | 0.0106 | 2901   | chr1  | - | 130228167 | 130256233 |
| NM_027182        | Trip13        | 2.64 | 0.0410 | 2267   | chr13 | - | 74049909  | 74075215  |

|              |          |      |        |       |       |   |           |           |
|--------------|----------|------|--------|-------|-------|---|-----------|-----------|
| NM_011196    | Ptger3   | 2.64 | 0.0281 | 2090  | chr3  | + | 157229855 | 157307722 |
| NM_012012    | Exo1     | 2.64 | 0.0384 | 5506  | chr1  | + | 177810908 | 177841527 |
| NM_011234    | Rad51    | 2.61 | 0.0486 | 2138  | chr2  | + | 118938552 | 118961806 |
| NM_001014976 | Espl1    | 2.61 | 0.0074 | 6630  | chr15 | + | 102126723 | 102154787 |
| NM_009971    | Csf3     | 2.59 | 0.0249 | 1363  | chr11 | + | 98562626  | 98564943  |
| NM_138673    | Stab2    | 2.59 | 0.0065 | 8152  | chr10 | - | 86303954  | 86470687  |
| NM_001009940 | Il19     | 2.57 | 0.0344 | 1066  | chr1  | - | 132829232 | 132835818 |
| NM_011623    | Top2a    | 2.57 | 0.0184 | 5217  | chr11 | - | 98854260  | 98885503  |
| NM_009860    | Cdc25c   | 2.57 | 0.0424 | 1941  | chr18 | - | 34892650  | 34911187  |
| NM_029662    | Mfsd2a   | 2.56 | 0.0469 | 2166  | chr4  | - | 122624093 | 122638431 |
| NM_009863    | Cdc7     | 2.55 | 0.0110 | 2960  | chr5  | + | 107393340 | 107413450 |
| NM_001037751 | Defb48   | 2.55 | 0.0284 | 445   | chr14 | - | 63596360  | 63603347  |
| NM_197959    | Kif18b   | 2.54 | 0.0341 | 3345  | chr11 | - | 102766832 | 102786438 |
| NM_001033484 | Iqgap3   | 2.53 | 0.0382 | 5676  | chr3  | + | 87885972  | 87924970  |
| NM_001141977 | Tpx2     | 2.53 | 0.0250 | 4365  | chr2  | + | 152673699 | 152721057 |
| NM_026560    | Cdca8    | 2.52 | 0.0254 | 1626  | chr4  | - | 124595708 | 124614161 |
| NM_011634    | Traip    | 2.52 | 0.0075 | 2697  | chr9  | + | 107853293 | 107874599 |
| NM_007681    | Cenpa    | 2.52 | 0.0324 | 1337  | chr5  | + | 30969274  | 30977199  |
| NM_011497    | Aurka    | 2.52 | 0.0286 | 1905  | chr2  | - | 172181695 | 172196006 |
| NM_023058    | Pkmyt1   | 2.50 | 0.0038 | 2039  | chr17 | + | 23863302  | 23873696  |
| NM_007634    | Ccnf     | 2.50 | 0.0276 | 3099  | chr17 | - | 24360176  | 24388354  |
| NM_144553    | Dlgap5   | 2.50 | 0.0430 | 2966  | chr14 | - | 48007453  | 48038082  |
| NM_011015    | Orc1     | 2.49 | 0.0500 | 3027  | chr4  | + | 108252058 | 108287436 |
| NM_028232    | Sgol1    | 2.48 | 0.0488 | 3609  | chr17 | - | 53814111  | 53828640  |
| NM_030712    | Cxcr6    | 2.48 | 0.0270 | 1893  | chr9  | + | 123715594 | 123720872 |
| NM_008506    | Mycl1    | 2.47 | 0.0164 | 3518  | chr4  | + | 122673341 | 122679723 |
| NM_026410    | Cdca5    | 2.47 | 0.0213 | 1906  | chr19 | + | 6085096   | 6091773   |
| NM_027650    | Speer3   | 2.46 | 0.0311 | 1191  | chr5  | + | 13791618  | 13796819  |
| NM_001160262 | Fam78b   | 2.45 | 0.0127 | 4986  | chr1  | + | 168931547 | 169021433 |
| NM_172578    | Mis18bp1 | 2.44 | 0.0472 | 4038  | chr12 | - | 66233720  | 66273567  |
| NM_011131    | Pold1    | 2.44 | 0.0073 | 3428  | chr7  | - | 51788113  | 51804185  |
| NM_008564    | Mcm2     | 2.42 | 0.0138 | 3381  | chr6  | - | 88833467  | 88848774  |
| NM_011495    | Plk4     | 2.42 | 0.0146 | 3567  | chr3  | + | 40603872  | 40620805  |
| NM_007526    | Barx1    | 2.41 | 0.0172 | 1366  | chr13 | + | 48758404  | 48761876  |
| NM_013787    | Skp2     | 2.40 | 0.0371 | 3204  | chr15 | - | 9041741   | 9070207   |
| NM_020034    | Hist1h1b | 2.39 | 0.0053 | 672   | chr13 | - | 21871751  | 21872423  |
| NM_009022    | Aldh1a2  | 2.38 | 0.0329 | 2264  | chr9  | + | 71063595  | 71144050  |
| NM_001040435 | Tacc3    | 2.38 | 0.0365 | 2637  | chr5  | + | 34000795  | 34014846  |
| NM_153544    | BC030867 | 2.38 | 0.0347 | 2543  | chr11 | + | 102110195 | 102126497 |
| NM_001113204 | Ncam1    | 2.35 | 0.0271 | 6993  | chr9  | - | 49310250  | 49607174  |
| NM_008446    | Kif4     | 2.34 | 0.0326 | 4712  | chrX  | + | 97821403  | 97922610  |
| NM_001146081 | Fancb    | 2.34 | 0.0364 | 2984  | chrX  | + | 161418523 | 161435204 |
| NM_001081363 | Cenpf    | 2.34 | 0.0332 | 11130 | chr1  | - | 191464492 | 191511965 |
| NM_024184    | Asf1b    | 2.34 | 0.0397 | 1599  | chr8  | + | 86479592  | 86494094  |
| NM_013882    | Gtse1    | 2.34 | 0.0065 | 2707  | chr15 | + | 85690375  | 85707003  |
| NM_172786    | Il20ra   | 2.34 | 0.0247 | 2088  | chr10 | + | 19432392  | 19479859  |
| NM_001164250 | Tpm1     | 2.33 | 0.0241 | 1702  | chr9  | - | 66870399  | 66897020  |
| NM_029898    | Ankrd55  | 2.33 | 0.0296 | 2781  | chr13 | + | 113078658 | 113174210 |
| NM_001081306 | Ptprz1   | 2.32 | 0.0393 | 8068  | chr6  | + | 22825501  | 23002916  |
| NM_008815    | Etv4     | 2.32 | 0.0224 | 2336  | chr11 | - | 101631055 | 101646624 |
| NM_013538    | Cdca3    | 2.30 | 0.0490 | 1488  | chr6  | + | 124780193 | 124783719 |
| NM_178309    | Brip1    | 2.30 | 0.0307 | 6933  | chr11 | - | 85871637  | 86014695  |
| NM_026778    | Cthrc1   | 2.29 | 0.0433 | 1164  | chr15 | + | 38908477  | 38918665  |
| NM_008565    | Mcm4     | 2.29 | 0.0312 | 3589  | chr16 | - | 15623989  | 15637493  |

|              |               |      |        |       |       |   |           |           |
|--------------|---------------|------|--------|-------|-------|---|-----------|-----------|
| NM_013749    | Tnfrsf12a     | 2.28 | 0.0437 | 980   | chr17 | - | 23812411  | 23814416  |
| NM_008632    | Mtap2         | 2.27 | 0.0407 | 5445  | chr1  | + | 66221902  | 66489157  |
| NM_017407    | Spag5         | 2.25 | 0.0426 | 3822  | chr11 | + | 78115092  | 78135956  |
| NM_029368    | 1700029F09Rik | 2.24 | 0.0241 | 1265  | chr1  | - | 44143461  | 44159233  |
| NM_025995    | Fbxo5         | 2.24 | 0.0408 | 1820  | chr10 | + | 4541075   | 4547383   |
| NM_028109    | Tpx2          | 2.24 | 0.0434 | 4352  | chr2  | + | 152673699 | 152721057 |
| NM_172616    | C330027C09Rik | 2.23 | 0.0475 | 3974  | chr16 | + | 48994300  | 49019818  |
| NM_028131    | Cenpn         | 2.21 | 0.0235 | 1768  | chr8  | + | 119445639 | 119465403 |
| NM_030609    | Hist1h1a      | 2.19 | 0.0438 | 747   | chr13 | + | 23855536  | 23856283  |
| NM_010006    | Cyp2d9        | 2.19 | 0.0070 | 1651  | chr15 | + | 82282806  | 82287257  |
| NM_009928    | Col15a1       | 2.18 | 0.0463 | 5335  | chr4  | + | 47220883  | 47326037  |
| NM_021288    | Tyms          | 2.18 | 0.0300 | 3798  | chr5  | - | 30384739  | 30400165  |
| NM_001103182 | Lin9          | 2.17 | 0.0098 | 2996  | chr1  | + | 182571464 | 182620818 |
| NM_001164485 | Fam170b       | 2.17 | 0.0251 | 1694  | chr14 | + | 33647147  | 33649974  |
| NM_001029856 | Atad5         | 2.16 | 0.0129 | 7272  | chr11 | + | 79902901  | 79949293  |
| NM_009171    | Shmt1         | 2.16 | 0.0262 | 2074  | chr11 | - | 60602398  | 60624767  |
| NM_001162506 | Troap         | 2.16 | 0.0357 | 2255  | chr15 | + | 98905403  | 98913840  |
| NM_027699    | 1700108M19Rik | 2.16 | 0.0207 | 660   | chr12 | - | 36934931  | 36944789  |
| NM_029150    | Spata16       | 2.16 | 0.0093 | 2011  | chr3  | + | 26536552  | 26882134  |
| NM_001039934 | Mtap2         | 2.16 | 0.0218 | 5535  | chr1  | + | 66221902  | 66489157  |
| NM_001159513 | H2afy         | 2.14 | 0.0101 | 1975  | chr13 | - | 56174982  | 56236911  |
| NM_001033170 | Fam83e        | 2.13 | 0.0209 | 2900  | chr7  | + | 52976589  | 52984862  |
| NM_001034867 | Pm20d2        | 2.13 | 0.0035 | 5578  | chr4  | - | 33257381  | 33276712  |
| NM_028083    | Chaf1b        | 2.12 | 0.0237 | 1913  | chr16 | + | 93884145  | 93906351  |
| NM_010305    | Gnai1         | 2.12 | 0.0427 | 3193  | chr5  | - | 17770952  | 17866231  |
| NM_026340    | Pop1          | 2.12 | 0.0042 | 3303  | chr15 | + | 34425065  | 34460408  |
| NM_001080129 | Tmpo          | 2.12 | 0.0212 | 3533  | chr10 | - | 90610315  | 90634327  |
| NM_001159317 | Il1rap        | 2.11 | 0.0192 | 4031  | chr16 | + | 26581790  | 26725233  |
| NM_178184    | Hist1h2an     | 2.11 | 0.0040 | 393   | chr13 | - | 21878694  | 21879087  |
| NM_011711    | Fmnl3         | 2.11 | 0.0034 | 4428  | chr15 | - | 99147653  | 99200897  |
| NM_026024    | Ube2t         | 2.10 | 0.0438 | 1079  | chr1  | + | 136859153 | 136870714 |
| NM_145142    | Chst10        | 2.09 | 0.0063 | 3135  | chr1  | - | 38920717  | 38955005  |
| NM_177372    | Dna2          | 2.09 | 0.0459 | 4122  | chr10 | + | 62409776  | 62436936  |
| NM_027435    | Atad2         | 2.09 | 0.0231 | 5683  | chr15 | - | 57925601  | 57966637  |
| NM_013733    | Chaf1a        | 2.08 | 0.0344 | 3308  | chr17 | + | 56179838  | 56207449  |
| NM_177357    | Kalrn         | 2.08 | 0.0236 | 15439 | chr16 | - | 33969158  | 34514113  |
| NM_001080995 | 4632434I11Rik | 2.08 | 0.0243 | 3450  | chr7  | - | 100006036 | 100022742 |
| NM_011284    | Rpa2          | 2.07 | 0.0160 | 1782  | chr4  | + | 132324274 | 132334661 |
| NM_001033166 | 2700094K13Rik | 2.07 | 0.0140 | 697   | chr2  | - | 84509377  | 84510865  |
| NM_134010    | Nup107        | 2.07 | 0.0269 | 3092  | chr10 | - | 117187698 | 117229761 |
| NM_001081390 | Palld         | 2.06 | 0.0368 | 3566  | chr8  | - | 63993819  | 64381487  |
| NM_001080130 | Tmpo          | 2.05 | 0.0174 | 3413  | chr10 | - | 90610315  | 90634327  |
| NM_133815    | Lbr           | 2.05 | 0.0043 | 3568  | chr1  | - | 183745445 | 183772532 |
| NM_181589    | Ckap2l        | 2.04 | 0.0353 | 3154  | chr2  | - | 129093945 | 129122948 |
| NM_178211    | Hist1h4k      | 2.04 | 0.0148 | 312   | chr13 | - | 21842062  | 21842374  |
| NM_010158    | Khdrbs3       | 2.04 | 0.0253 | 1954  | chr15 | + | 68758849  | 68923948  |
| NM_013455    | Acr           | 2.04 | 0.0462 | 1503  | chr15 | + | 89398756  | 89405015  |
| NM_178591    | Nrg1          | 2.02 | 0.0230 | 2103  | chr8  | - | 32928499  | 33028675  |
| NM_007525    | Bard1         | 2.02 | 0.0251 | 5448  | chr1  | - | 71074108  | 71149546  |
| NM_020567    | Gmnn          | 2.01 | 0.0473 | 995   | chr13 | - | 24843713  | 24853806  |
| NM_016692    | Incenp        | 2.01 | 0.0199 | 3217  | chr19 | - | 9946786   | 9974023   |
| NM_134184    | Vmn1r16       | 2.01 | 0.0411 | 912   | chr6  | - | 57272717  | 57273629  |
| NM_198605    | F630043A04Rik | 2.01 | 0.0168 | 2260  | chr14 | - | 58425397  | 58445000  |
| NM_001037719 | Btla          | 2.01 | 0.0140 | 3235  | chr16 | + | 45224449  | 45253008  |

|              |        |      |        |      |       |   |           |           |
|--------------|--------|------|--------|------|-------|---|-----------|-----------|
| NM_009272    | Srm    | 2.00 | 0.0213 | 1328 | chr4  | + | 147965621 | 147968728 |
| NM_001080711 | Dfnb59 | 2.00 | 0.0085 | 1219 | chr2  | + | 76488329  | 76496613  |
| NM_001076789 | Cbx5   | 2.00 | 0.0358 | 8801 | chr15 | - | 103021976 | 103070247 |
