# Supplementary material for: Fibrogenic Activity of MECP2 Is Regulated by Phosphorylation in Hepatic Stellate Cells
Source: PubMed Central journal article supplement (PMC6853276; doi:10.1053/j.gastro.2019.07.029), 2019-11
Supplement: mmc3.pdf [file mmc3.pdf]

**Supplementary Table 3. Differentially expressed (DE) Upregulated lncRNAs**

| Sequence name      | FC    | p-val | length | S | Ch    | Start     | End       | Source*   | Associated Gene |
|--------------------|-------|-------|--------|---|-------|-----------|-----------|-----------|-----------------|
| AK042398           | 10.96 | 0.038 | 1455   | - | chr13 | 13681874  | 13683327  | fantom3   | NM_010748       |
| AK042700           | 6.75  | 0.041 | 2340   | - | chr4  | 42172661  | 42175000  | fantom3   |                 |
| AK039830           | 6.39  | 0.003 | 3332   | + | chr3  | 15128606  | 15131937  | NRED      |                 |
| uc.183-            | 5.49  | 0.007 | 236    | + | chr11 | 32580147  | 32580383  | UCR       | NM_134015       |
| AK145320           | 5.15  | 0.020 | 2227   | + | chr16 | 81871754  | 81873980  | fantom3   |                 |
| uc.289+            | 4.96  | 0.001 | 254    | + | chr14 | 23564681  | 23564935  | UCR       | NM_028275       |
| AK143356           | 4.75  | 0.017 | 2289   | + | chr5  | 26408711  | 26410997  | fantom3   | NM_001177579    |
| ENSMUST00000170876 | 4.73  | 0.028 | 1004   | - | chr11 | 96607345  | 96608724  | Ensembl   | NM_001177899    |
| ENSMUST00000170876 | 4.73  | 0.028 | 1004   | - | chr11 | 96607345  | 96608724  | Ensembl   | NM_001177898    |
| ENSMUST00000170876 | 4.73  | 0.028 | 1004   | - | chr11 | 96607345  | 96608724  | Ensembl   | NM_001033186    |
| ENSMUST00000167770 | 4.36  | 0.024 | 966    | + | chr8  | 35157601  | 35159203  | Ensembl   | NM_011722       |
| NR_001584          | 4.27  | 0.046 | 1121   | + | chr5  | 14945293  | 14978541  | RefSeq_NR |                 |
| ENSMUST00000169039 | 4.21  | 0.009 | 3539   | + | chr4  | 42566009  | 42600570  | Ensembl   |                 |
| uc007bdt.1         | 4.16  | 0.017 | 487    | + | chr1  | 59383514  | 59409292  | UCSC_kg   | NM_001033373    |
| AK087836           | 4.15  | 0.023 | 1241   | + | chr5  | 26341388  | 26342629  | fantom3   |                 |
| AK087893           | 3.88  | 0.027 | 1799   | + | chr5  | 26423108  | 26424904  | fantom3   |                 |
| AK038167           | 3.88  | 0.004 | 2755   | + | chr1  | 110313653 | 110316409 | fantom3   |                 |
| AK033305           | 3.82  | 0.043 | 1866   | + | chr5  | 26340763  | 26342629  | fantom3   |                 |
| AK048921           | 3.78  | 0.048 | 1515   | - | chr8  | 115092137 | 115093651 | fantom3   | NM_130457       |
| ENSMUST00000121909 | 3.76  | 0.031 | 1569   | + | chrX  | 111135605 | 111137174 | Ensembl   |                 |
| AK132740           | 3.69  | 0.037 | 1579   | + | chr5  | 121835530 | 121837110 | fantom3   | NM_172275       |
| AK132740           | 3.69  | 0.037 | 1579   | + | chr5  | 121835530 | 121837110 | fantom3   | NM_001163470    |
| ENSMUST00000157493 | 3.67  | 0.009 | 312    | + | chr6  | 8389352   | 8389664   | Ensembl   |                 |
| NR_003564          | 3.64  | 0.001 | 812    | - | chr11 | 88825980  | 88828231  | RefSeq_NR |                 |
| AK050947           | 3.57  | 0.008 | 1870   | - | chr12 | 8298631   | 8300500   | fantom3   |                 |
| AK045912           | 3.49  | 0.004 | 1413   | - | chr3  | 24737848  | 24739261  | fantom3   |                 |
| AK134457           | 3.37  | 0.017 | 3169   | + | chr5  | 26418740  | 26421912  | fantom3   |                 |
| uc008wjsx.1        | 3.30  | 0.047 | 454    | - | chr5  | 8092259   | 8116659   | UCSC_kg   | NM_001007221    |
| uc008wjsx.1        | 3.30  | 0.047 | 454    | - | chr5  | 8092259   | 8116659   | UCSC_kg   | NM_001098225    |
| uc008wjsx.1        | 3.30  | 0.047 | 454    | - | chr5  | 8092259   | 8116659   | UCSC_kg   | NM_001007220    |
| NR_033506          | 3.26  | 0.024 | 3558   | + | chr4  | 41763293  | 42104673  | RefSeq_NR | NM_001199960    |
| NR_033506          | 3.26  | 0.024 | 3558   | + | chr4  | 41763293  | 42104673  | RefSeq_NR | NM_001199963    |
| NR_033506          | 3.26  | 0.024 | 3558   | + | chr4  | 41763293  | 42104673  | RefSeq_NR | NM_001199964    |
| NR_033506          | 3.26  | 0.024 | 3558   | + | chr4  | 41763293  | 42104673  | RefSeq_NR | NM_001199966    |
| NR_033506          | 3.26  | 0.024 | 3558   | + | chr4  | 41763293  | 42104673  | RefSeq_NR | NM_001177580    |
| NR_033506          | 3.26  | 0.024 | 3558   | + | chr4  | 41763293  | 42104673  | RefSeq_NR | NM_001099348    |
| NR_033506          | 3.26  | 0.024 | 3558   | + | chr4  | 41763293  | 42104673  | RefSeq_NR | NM_023052       |
| NR_033506          | 3.26  | 0.024 | 3558   | + | chr4  | 41763293  | 42104673  | RefSeq_NR | NM_023052       |
| NR_033506          | 3.26  | 0.024 | 3558   | + | chr4  | 41763293  | 42104673  | RefSeq_NR | NM_011335       |
| NR_033506          | 3.26  | 0.024 | 3558   | + | chr4  | 41763293  | 42104673  | RefSeq_NR | NM_011335       |
| NR_033506          | 3.26  | 0.024 | 3558   | + | chr4  | 41763293  | 42104673  | RefSeq_NR | NM_001193666    |
| NR_033506          | 3.26  | 0.024 | 3558   | + | chr4  | 41763293  | 42104673  | RefSeq_NR | NM_001193666    |
| NR_033506          | 3.26  | 0.024 | 3558   | + | chr4  | 41763293  | 42104673  | RefSeq_NR | NM_010550       |
| NR_033506          | 3.26  | 0.024 | 3558   | + | chr4  | 41763293  | 42104673  | RefSeq_NR | NM_001199962    |
| NR_033506          | 3.26  | 0.024 | 3558   | + | chr4  | 41763293  | 42104673  | RefSeq_NR | NM_001164046    |
| NR_033506          | 3.26  | 0.024 | 3558   | + | chr4  | 41763293  | 42104673  | RefSeq_NR | NM_001199961    |
| NR_033506          | 3.26  | 0.024 | 3558   | + | chr4  | 41763293  | 42104673  | RefSeq_NR | NM_001100596    |
| NR_033506          | 3.26  | 0.024 | 3558   | + | chr4  | 41763293  | 42104673  | RefSeq_NR | NM_001193668    |
| NR_033506          | 3.26  | 0.024 | 3558   | + | chr4  | 41763293  | 42104673  | RefSeq_NR | NM_001193668    |
| NR_033506          | 3.26  | 0.024 | 3558   | + | chr4  | 41763293  | 42104673  | RefSeq_NR | NM_001085530    |
| NR_033506          | 3.26  | 0.024 | 3558   | + | chr4  | 41763293  | 42104673  | RefSeq_NR | NM_001199959    |
| NR_033506          | 3.26  | 0.024 | 3558   | + | chr4  | 41763293  | 42104673  | RefSeq_NR | NM_001199965    |
| ENSMUST00000121026 | 3.22  | 0.005 | 360    | + | chrX  | 138495397 | 138495757 | Ensembl   |                 |
| AK046587           | 3.19  | 0.029 | 1571   | - | chr7  | 113033809 | 113035380 | fantom3   |                 |
| AK132557           | 3.18  | 0.015 | 3835   | + | chr14 | 64456259  | 64460091  | fantom3   |                 |

|                    |      |       |      |   |       |           |           |           |              |
|--------------------|------|-------|------|---|-------|-----------|-----------|-----------|--------------|
| ENSMUST00000119221 | 3.11 | 0.032 | 343  | - | chr4  | 126201573 | 126201916 | Ensembl   | NM_153177    |
| ENSMUST00000131638 | 3.10 | 0.045 | 1216 | + | chr18 | 60380496  | 60381712  | Ensembl   | NM_001033767 |
| uc007qle.1         | 3.04 | 0.010 | 2940 | - | chr13 | 50772139  | 50775593  | UCSC_kg   |              |
| AK082796           | 2.99 | 0.017 | 1483 | + | chr11 | 66849005  | 66850488  | fantom3   |              |
| uc009rmk.1         | 2.96 | 0.023 | 439  | + | chr9  | 107500683 | 107501122 | UCSC_kg   | NM_001042779 |
| uc009rmk.1         | 2.96 | 0.023 | 439  | + | chr9  | 107500683 | 107501122 | UCSC_kg   | NM_009153    |
| ENSMUST00000101090 | 2.91 | 0.044 | 478  | + | chr5  | 77357392  | 77357870  | Ensembl   | NM_172146    |
| NR_033123          | 2.91 | 0.022 | 4551 | - | chr4  | 41902018  | 41925853  | RefSeq_NR |              |
| AK140313           | 2.87 | 0.032 | 4953 | - | chr15 | 68152942  | 68157895  | fantom3   |              |
| MM9LINC RNAEXON115 |      |       |      |   |       |           |           |           |              |
| 23-                | 2.85 | 0.002 | 444  | - | chr13 | 28510817  | 28511261  | lincRNA   |              |
| ENSMUST00000130159 | 2.84 | 0.001 | 458  | - | chrX  | 76511897  | 76540620  | Ensembl   |              |
| uc007aev.1         | 2.84 | 0.012 | 2257 | - | chr1  | 3638391   | 3648985   | UCSC_kg   | NM_001011874 |
| uc008ysj.1         | 2.81 | 0.045 | 669  | + | chr5  | 112635825 | 112639018 | UCSC_kg   |              |
| NR_003248          | 2.76 | 0.005 | 3732 | - | chr9  | 98849573  | 98855729  | RefSeq_NR | NM_012020    |
| uc009iks.1         | 2.74 | 0.037 | 1133 | - | chr7  | 105830845 | 105851438 | UCSC_kg   | NM_028410    |
| ENSMUST00000172223 | 2.74 | 0.039 | 621  | - | chr3  | 96205072  | 96205937  | Ensembl   |              |
| ENSMUST00000155944 | 2.72 | 0.022 | 3543 | - | chr4  | 42418154  | 42452715  | Ensembl   |              |
| AK046186           | 2.72 | 0.003 | 1540 | - | chr7  | 130618901 | 130620441 | fantom3   |              |
| ENSMUST00000144604 | 2.72 | 0.012 | 741  | - | chr4  | 101019135 | 101028853 | Ensembl   |              |
| MM9LINC RNAEXON115 |      |       |      |   |       |           |           |           |              |
| 22-                | 2.72 | 0.015 | 238  | - | chr13 | 28510437  | 28510675  | lincRNA   |              |
| MM9LINC RNAEXON104 |      |       |      |   |       |           |           |           |              |
| 19-                | 2.71 | 0.034 | 394  | - | chr6  | 31149982  | 31150376  | lincRNA   |              |
| uc008skp.1         | 2.70 | 0.024 | 371  | + | chr4  | 41763413  | 41763784  | UCSC_kg   |              |
| ENSMUST00000171819 | 2.67 | 0.026 | 3539 | + | chr4  | 41925874  | 41960431  | Ensembl   |              |
| ENSMUST00000140782 | 2.66 | 0.003 | 1853 | + | chr3  | 152329876 | 152344396 | Ensembl   | NM_001081277 |
| AK134233           | 2.65 | 0.019 | 2190 | - | chr8  | 122083619 | 122085806 | fantom3   |              |
| MM9LINC RNAEXON109 |      |       |      |   |       |           |           |           |              |
| 44-                | 2.64 | 0.037 | 1342 | - | chr2  | 71581306  | 71582648  | lincRNA   |              |
| uc008wth.1         | 2.62 | 0.046 | 777  | - | chr5  | 26786609  | 26819829  | UCSC_kg   |              |
| AK047207           | 2.62 | 0.039 | 526  | + | chr4  | 41760540  | 41761066  | fantom3   |              |
| uc008zsj.1         | 2.62 | 0.019 | 576  | - | chr5  | 135487992 | 135489007 | UCSC_kg   | NM_145215    |
| uc008zsj.1         | 2.62 | 0.019 | 576  | - | chr5  | 135487992 | 135489007 | UCSC_kg   | NM_001190437 |
| ENSMUST00000130639 | 2.62 | 0.027 | 909  | - | chr17 | 8486230   | 8503917   | Ensembl   | NM_134114    |
| ENSMUST00000130639 | 2.62 | 0.027 | 909  | - | chr17 | 8486230   | 8503917   | Ensembl   | NM_018819    |
|                    |      |       |      |   | chr9_ |           |           |           |              |
|                    |      |       |      |   | rando |           |           |           |              |
| AK134642           | 2.60 | 0.029 | 1838 | - | m     | 147587    | 149423    | fantom3   |              |
| ENSMUST00000167606 | 2.59 | 0.028 | 2215 | - | chr9  | 20412209  | 20416929  | Ensembl   |              |
|                    |      |       |      |   | chrUn |           |           |           |              |
|                    |      |       |      |   | _rand |           |           |           |              |
| ENSMUST00000115902 | 2.56 | 0.026 | 1386 | - | om    | 554393    | 555791    | Ensembl   |              |
| uc009fxb.1         | 2.54 | 0.003 | 283  | + | chr7  | 28554249  | 28555744  | UCSC_kg   |              |
| ENSMUST00000141440 | 2.53 | 0.037 | 269  | + | chr6  | 145004908 | 145008412 | Ensembl   | NM_007532    |
| ENSMUST00000119405 | 2.51 | 0.045 | 1849 | + | chr4  | 41764013  | 41765862  | Ensembl   |              |
| ENSMUST00000119510 | 2.50 | 0.016 | 849  | + | chr1  | 89921785  | 89922634  | Ensembl   |              |
| ENSMUST00000115901 | 2.50 | 0.036 | 672  | + | chr4  | 42106046  | 42106718  | Ensembl   |              |
| ENSMUST00000146404 | 2.50 | 0.001 | 1675 | + | chr2  | 38279521  | 38311371  | Ensembl   |              |
|                    |      |       |      |   | chrUn |           |           |           |              |
|                    |      |       |      |   | _rand |           |           |           |              |
| ENSMUST00000166295 | 2.49 | 0.025 | 1446 | + | om    | 610376    | 616170    | Ensembl   |              |
| ENSMUST00000152279 | 2.47 | 0.021 | 1157 | - | chr14 | 62238317  | 62301162  | Ensembl   |              |
| ENSMUST00000099292 | 2.44 | 0.048 | 1743 | - | chr2  | 143998885 | 144015026 | Ensembl   |              |
| ENSMUST00000133960 | 2.43 | 0.017 | 2953 | + | chr4  | 3173151   | 3185239   | Ensembl   |              |
| ENSMUST00000117125 | 2.43 | 0.046 | 1284 | - | chr4  | 41896151  | 41897435  | Ensembl   |              |
| NR_026688          | 2.42 | 0.021 | 519  | - | chr5  | 135487991 | 135489027 | RefSeq_NR | NM_145215    |
| NR_026688          | 2.42 | 0.021 | 519  | - | chr5  | 135487991 | 135489027 | RefSeq_NR | NM_001190437 |
| ENSMUST00000053717 | 2.42 | 0.013 | 684  | - | chr19 | 20660563  | 20661247  | Ensembl   |              |
| MM9LINC RNAEXON120 |      |       |      |   |       |           |           |           |              |
| 72-                | 2.42 | 0.035 | 2230 | - | chr1  | 137562833 | 137565063 | lincRNA   |              |

|                    |      |       |      |   |       |           |           |           |              |
|--------------------|------|-------|------|---|-------|-----------|-----------|-----------|--------------|
| AK052921           | 2.42 | 0.031 | 1526 | + | chr6  | 66222498  | 66234839  | NRED      |              |
| ENSMUST00000120408 | 2.41 | 0.036 | 822  | - | chr2  | 177715238 | 177717405 | Ensembl   |              |
| ENSMUST00000151294 | 2.39 | 0.015 | 731  | - | chr7  | 111682121 | 111683365 | Ensembl   |              |
| NR_015566          | 2.38 | 0.045 | 5195 | + | chr1  | 196843592 | 196864102 | RefSeq_NR |              |
| ENSMUST00000144933 | 2.37 | 0.043 | 557  | + | chr4  | 3174664   | 3175674   | Ensembl   |              |
| AK158457           | 2.37 | 0.018 | 2833 | - | chr3  | 96047474  | 96050303  | fantom3   | NM_178212    |
| AK158457           | 2.37 | 0.018 | 2833 | - | chr3  | 96047474  | 96050303  | fantom3   | NM_013549    |
| AK158457           | 2.37 | 0.018 | 2833 | - | chr3  | 96047474  | 96050303  | fantom3   | NM_178216    |
| uc008ski.1         | 2.37 | 0.029 | 426  | - | chr4  | 41758222  | 41758648  | UCSC_kg   |              |
| AK142834           | 2.35 | 0.042 | 2388 | + | chrX  | 118021841 | 118024227 | fantom3   |              |
| CR515238           | 2.35 | 0.034 | 215  | - | chr12 | 25852471  | 25852681  | lincRNA   |              |
| uc008tsr.1         | 2.35 | 0.046 | 864  | + | chr4  | 94742359  | 94822969  | UCSC_kg   |              |
| MM9LINC RNAEXON113 |      |       |      |   |       |           |           |           |              |
| 65+                | 2.34 | 0.046 | 324  | + | chr15 | 85470594  | 85470918  | lincRNA   |              |
| ENSMUST00000121568 | 2.34 | 0.024 | 512  | - | chrX  | 87989884  | 87990401  | Ensembl   |              |
| uc008wsy.1         | 2.33 | 0.006 | 2609 | + | chr5  | 25005758  | 25008367  | UCSC_kg   |              |
| AK145626           | 2.33 | 0.028 | 1756 | - | chr4  | 42101119  | 42102873  | fantom3   |              |
| AK086591           | 2.31 | 0.016 | 1002 | + | chr1  | 92177032  | 92180487  | fantom3   |              |
| ENSMUST00000151170 | 2.31 | 0.010 | 1607 | + | chr6  | 17148106  | 17155693  | Ensembl   |              |
| ENSMUST00000128654 | 2.30 | 0.014 | 1870 | - | chr11 | 18745853  | 18772158  | Ensembl   |              |
| MM9LINC RNAEXON120 |      |       |      |   |       |           |           |           |              |
| 61+                | 2.29 | 0.008 | 70   | + | chr1  | 122987123 | 122987193 | lincRNA   |              |
| ENSMUST00000171522 | 2.28 | 0.036 | 3220 | - | chr6  | 21935907  | 22017687  | Ensembl   | NM_001081351 |
| ENSMUST00000151501 | 2.28 | 0.014 | 3326 | + | chr14 | 70132590  | 70145676  | Ensembl   | NM_134078    |
| ENSMUST00000121579 | 2.28 | 0.023 | 328  | + | chr4  | 25346495  | 25346823  | Ensembl   |              |
| uc007wgm.1         | 2.28 | 0.038 | 269  | - | chr15 | 74826881  | 74828331  | UCSC_kg   | NM_010738    |
| AK076168           | 2.24 | 0.004 | 2312 | + | chr9  | 41427074  | 41429386  | fantom3   |              |
| uc009qvo.1         | 2.23 | 0.049 | 1482 | + | chr9  | 81525964  | 81538763  | UCSC_kg   | NM_010482    |
| ENSMUST00000165103 | 2.22 | 0.036 | 4231 | - | chr13 | 39037411  | 39043182  | Ensembl   | NM_134060    |
| ENSMUST00000165103 | 2.22 | 0.036 | 4231 | - | chr13 | 39037411  | 39043182  | Ensembl   | NM_001170431 |
| ENSMUST00000165103 | 2.22 | 0.036 | 4231 | - | chr13 | 39037411  | 39043182  | Ensembl   | NM_001170430 |
| ENSMUST00000122214 | 2.22 | 0.007 | 226  | + | chr4  | 122132452 | 122132678 | Ensembl   |              |
| ENSMUST00000142634 | 2.21 | 0.010 | 608  | - | chr4  | 100195851 | 100200406 | Ensembl   | NM_001033773 |
| ENSMUST00000138007 | 2.21 | 0.033 | 3220 | + | chr11 | 88579958  | 88583914  | Ensembl   | NM_054043    |
| ENSMUST00000138007 | 2.21 | 0.033 | 3220 | + | chr11 | 88579958  | 88583914  | Ensembl   | NM_001201341 |
| ENSMUST00000130892 | 2.20 | 0.047 | 1250 | - | chr5  | 110596526 | 110605523 | Ensembl   | NM_008146    |
| ENSMUST00000130892 | 2.20 | 0.047 | 1250 | - | chr5  | 110596526 | 110605523 | Ensembl   | NM_172717    |
| AK043175           | 2.20 | 0.006 | 2258 | - | chr4  | 98858830  | 98861087  | fantom3   | NM_175029    |
| AK043175           | 2.20 | 0.006 | 2258 | - | chr4  | 98858830  | 98861087  | fantom3   | NM_001145967 |
| NR_028122          | 2.20 | 0.022 | 459  | + | chr2  | 163298280 | 163298739 | RefSeq_NR | NM_173397    |
| AK085737           | 2.19 | 0.012 | 2426 | - | chr17 | 74226578  | 74229003  | fantom3   |              |
| ENSMUST00000154798 | 2.19 | 0.032 | 1045 | - | chr11 | 102481109 | 102485730 | Ensembl   |              |
| ENSMUST00000137057 | 2.19 | 0.012 | 656  | - | chr6  | 129182643 | 129188000 | Ensembl   |              |
| AK139146           | 2.16 | 0.002 | 964  | - | chr11 | 3227122   | 3228084   | fantom3   |              |
| ENSMUST00000117226 | 2.14 | 0.008 | 497  | + | chr14 | 54349178  | 54349856  | Ensembl   |              |
| MM9LINC RNAEXON106 |      |       |      |   |       |           |           |           |              |
| 07-                | 2.14 | 0.032 | 2164 | - | chr5  | 113627537 | 113629701 | lincRNA   |              |
| AK083522           | 2.14 | 0.026 | 1019 | + | chr2  | 167458749 | 167459769 | fantom3   |              |
| ENSMUST00000119869 | 2.14 | 0.044 | 1048 | + | chr4  | 84343766  | 84344814  | Ensembl   |              |
| uc007qkb.1         | 2.14 | 0.025 | 2940 | + | chr13 | 50357183  | 50360637  | UCSC_kg   |              |
| ENSMUST00000132326 | 2.13 | 0.019 | 460  | - | chr2  | 74541304  | 74550111  | Ensembl   | NM_010468    |
| ENSMUST00000132326 | 2.13 | 0.019 | 460  | - | chr2  | 74541304  | 74550111  | Ensembl   | NM_008276    |
| AK039686           | 2.13 | 0.013 | 2347 | - | chr6  | 128137835 | 128150641 | NRED      |              |
| uc007bdq.1         | 2.13 | 0.040 | 395  | + | chr1  | 59344613  | 59367703  | UCSC_kg   | NM_001033373 |
| ENSMUST00000145799 | 2.12 | 0.001 | 511  | - | chr2  | 74548249  | 74554053  | Ensembl   | NM_010468    |
| ENSMUST00000118930 | 2.12 | 0.022 | 291  | - | chr2  | 176386914 | 176387205 | Ensembl   | NM_001177543 |
| ENSMUST00000163635 | 2.12 | 0.044 | 445  | - | chr14 | 8597331   | 8606583   | Ensembl   |              |
| AK033843           | 2.11 | 0.020 | 1237 | + | chr7  | 19449514  | 19450751  | fantom3   |              |
| uc008gfj.1         | 2.11 | 0.032 | 4277 | - | chr19 | 5798394   | 5802671   | UCSC_kg   |              |
| AK079652           | 2.10 | 0.026 | 1049 | + | chr6  | 125196441 | 125197489 | fantom3   |              |

|                    |      |       |      |   |       |           |           |           |              |
|--------------------|------|-------|------|---|-------|-----------|-----------|-----------|--------------|
| AK080602           | 2.10 | 0.006 | 2773 | + | chr14 | 64471552  | 64474322  | fantom3   |              |
| AK020198           | 2.10 | 0.017 | 1035 | - | chr2  | 11259992  | 11320127  | fantom3   |              |
| AK083796           | 2.10 | 0.050 | 2842 | + | chr7  | 28565647  | 28568488  | NRED      |              |
| ENSMUST00000139288 | 2.10 | 0.029 | 410  | + | chr2  | 33033421  | 33037401  | Ensembl   | NM_175211    |
| uc007mnh.1         | 2.09 | 0.035 | 626  | + | chr11 | 117472658 | 117474111 | UCSC_kg   |              |
| uc008smn.1         | 2.09 | 0.027 | 684  | + | chr4  | 42415893  | 42416577  | UCSC_kg   |              |
| BY031985           | 2.08 | 0.033 | 470  | - | chr14 | 92394267  | 92394664  | lincRNA   |              |
| ENSMUST00000127631 | 2.07 | 0.009 | 942  | + | chr8  | 70480668  | 70501950  | Ensembl   | NM_177698    |
| AK053656           | 2.07 | 0.002 | 4598 | - | chr8  | 118211623 | 118216217 | fantom3   |              |
| ENSMUST00000118430 | 2.06 | 0.012 | 226  | + | chr4  | 121870821 | 121871047 | Ensembl   |              |
| MM9LINC RNAEXON104 |      |       |      |   |       |           |           |           |              |
| 85-                | 2.06 | 0.022 | 1649 | - | chr6  | 99561279  | 99562928  | lincRNA   |              |
| AK043941           | 2.06 | 0.032 | 924  | - | chr7  | 111411900 | 111412824 | fantom3   |              |
| uc007iyy.1         | 2.06 | 0.013 | 520  | + | chr11 | 54950545  | 54953695  | UCSC_kg   | NM_172258    |
| ENSMUST00000120530 | 2.06 | 0.012 | 342  | - | chr17 | 92438999  | 92439341  | Ensembl   |              |
| uc007zaj.1         | 2.06 | 0.028 | 3017 | + | chr16 | 33755635  | 33768281  | UCSC_kg   | NM_175256    |
| humanlincRNA2392-  | 2.05 | 0.027 | 9266 | + | chrX  | 152944622 | 152953888 | lincRNA   |              |
| ENSMUST00000123905 | 2.04 | 0.044 | 659  | - | chr16 | 30969478  | 30973604  | Ensembl   | NM_198626    |
| ENSMUST00000139653 | 2.04 | 0.017 | 675  | + | chr4  | 141640770 | 141643992 | Ensembl   | NM_145402    |
| AK043325           | 2.04 | 0.025 | 1003 | - | chr1  | 190912396 | 190913399 | fantom3   |              |
| ENSMUST00000161461 | 2.04 | 0.035 | 793  | + | chr1  | 162965308 | 162968670 | Ensembl   | NM_173424    |
| NR_015533          | 2.04 | 0.042 | 2006 | - | chr7  | 68850735  | 69072460  | RefSeq_NR |              |
| AK081202           | 2.03 | 0.020 | 2082 | - | chr1  | 196863022 | 196865102 | fantom3   |              |
| AK082426           | 2.03 | 0.015 | 1754 | + | chr17 | 70679696  | 70681450  | fantom3   |              |
| MM9LINC RNAEXON105 |      |       |      |   |       |           |           |           |              |
| 07-                | 2.03 | 0.050 | 176  | - | chr6  | 129188203 | 129188379 | lincRNA   |              |
| uc009aux.1         | 2.03 | 0.010 | 2991 | - | chr6  | 3283193   | 3296069   | UCSC_kg   |              |
| MM9LINC RNAEXON112 |      |       |      |   |       |           |           |           |              |
| 80-                | 2.03 | 0.050 | 2861 | - | chr16 | 30180887  | 30183748  | lincRNA   |              |
| uc007gjn.1         | 2.02 | 0.018 | 490  | + | chr10 | 81816999  | 81863591  | UCSC_kg   |              |
| ENSMUST00000121541 | 2.02 | 0.032 | 279  | + | chr8  | 22358662  | 22359442  | Ensembl   |              |
| AK082404           | 2.02 | 0.042 | 1340 | + | chr5  | 120876868 | 120878207 | fantom3   |              |
| MM9LINC RNAEXON117 |      |       |      |   |       |           |           |           |              |
| 01-                | 2.01 | 0.023 | 1027 | - | chr12 | 85220758  | 85221785  | lincRNA   |              |
| AK016911           | 2.00 | 0.017 | 1450 | - | chr10 | 75298720  | 75300169  | fantom3   |              |
| AK017999           | 2.00 | 0.020 | 1357 | + | chr6  | 125196422 | 125197490 | fantom3   |              |
| ENSMUST00000120181 | 2.00 | 0.024 | 324  | + | chr2  | 176526876 | 176527200 | Ensembl   | NM_001177543 |

The table contains the following information about the DE upregulated lncRNAs: Sequence name (the sequence identifier of the lncRNA), FC (Absolute Fold change is the absolute ratio (no log scale) of normalized intensities between two conditions), p-val (P-value, P-value calculated from t-test), length (RNA length), Chr (chromosome), S (DNA strand), Start and End (coding or non-coding genome location), , Source of the collection and Associated gene IS (the Accession number of the associated coding gene to the lncRNA).

\* Source of lncRNA collection:

- RefSeq\_NR: RefSeq validated non-coding RNA
- UCSC\_kg: UCSC known genes annotated as "non-coding", "near-coding" and "antisense" (<http://genome.ucsc.edu/cgi-bin/hgTables/>)
- Ensembl: Ensembl (<http://www.ensembl.org/index.html>)
- Fantom3: Fantom project (<http://fantom.gsc.riken.jp/>)
- RNAdb: RNAdb2.0 (<http://research.imb.uq.edu.au/rnadb/>)
- NRED: NRED (<http://jrm-research.imb.uq.edu.au/nred/cgi-bin/ncrnadb.pl>)
- UCR: "ultra-conserved region" among human, mouse and rat (<http://users.soe.ucsc.edu/~jill/ultra.html>)
- lincRNA: lincRNA identified by John Rinn's group (Guttman et al. 2009; Khalil et al. 2009)
