# Supplementary material for: Fibrogenic Activity of MECP2 Is Regulated by Phosphorylation in Hepatic Stellate Cells
Source: PubMed Central journal article supplement (PMC6853276; doi:10.1053/j.gastro.2019.07.029), 2019-11
Supplement: mmc4.pdf [file mmc4.pdf]

Supplementary Table 4. Differentially expressed (DE) Downregulated lncRNAs

| Sequence name         | FC   | p-val  | length | S | Ch    | Start     | End       | Source*   | Associated gene ID |
|-----------------------|------|--------|--------|---|-------|-----------|-----------|-----------|--------------------|
| ENSMUST00000116395    | 9.65 | 0.0002 | 240    | - | chrX  | 72117534  | 72117774  | Ensembl   |                    |
| uc009uoz.1            | 4.34 | 0.003  | 2940   | - | chrX  | 147726516 | 147779389 | UCSC_kg   | NM_198105          |
| humanlincRNA2046-     | 3.86 | 0.024  | 18943  | + | chr13 | 17931594  | 17950537  | lincRNA   |                    |
| NR_028427             | 3.85 | 0.029  | 5292   | - | chr19 | 53515701  | 53539286  | RefSeq_NR |                    |
| AK039897              | 3.65 | 0.024  | 903    | + | chr6  | 120901981 | 120902884 | fantom3   |                    |
| MM9LINC RNAEXON11597+ | 3.60 | 0.013  | 327    | + | chr13 | 83869681  | 83870008  | lincRNA   |                    |
| humanlincRNA1512-     | 3.49 | 0.005  | 5490   | + | chr5  | 37112733  | 37118223  | lincRNA   |                    |
| humanlincRNA1948+     | 3.49 | 0.011  | 26171  | + | chr10 | 30142092  | 30168263  | lincRNA   |                    |
| MM9LINC RNAEXON11652- | 3.41 | 0.012  | 802    | - | chr12 | 12895177  | 12895979  | lincRNA   |                    |
| mouselincRNA0294-     | 3.30 | 0.035  | 15295  | + | chr12 | 10663990  | 10679285  | lincRNA   |                    |
| MM9LINC RNAEXON11105+ | 3.23 | 0.016  | 493    | + | chr19 | 27461455  | 27461948  | lincRNA   |                    |
| ENSMUST00000166710    | 3.22 | 0.034  | 614    | + | chr5  | 13811241  | 13814452  | Ensembl   |                    |
| uc007pzn.1            | 3.22 | 0.034  | 2852   | - | chr13 | 31670024  | 31717661  | UCSC_kg   | NM_010225          |
| uc008hgf.1            | 3.19 | 0.014  | 1210   | - | chr19 | 34314826  | 34316036  | UCSC_kg   | NM_007392          |
| ENSMUST00000120731    | 3.17 | 0.034  | 1585   | + | chr4  | 54865999  | 54867584  | Ensembl   |                    |
| BY307334              | 3.05 | 0.009  | 377    | - | chr13 | 34873453  | 34906413  | lincRNA   |                    |
| MM9LINC RNAEXON10055- | 3.03 | 0.050  | 345    | - | chrX  | 135890738 | 135891083 | lincRNA   |                    |
| ENSMUST00000119494    | 3.02 | 0.036  | 1788   | + | chr5  | 35896832  | 35898620  | Ensembl   |                    |
| ENSMUST00000121232    | 2.95 | 0.019  | 1527   | - | chrX  | 8239427   | 8240954   | Ensembl   |                    |
| ENSMUST00000117514    | 2.91 | 0.028  | 1493   | - | chr16 | 91513385  | 91514878  | Ensembl   |                    |
| ENSMUST00000140978    | 2.88 | 0.008  | 654    | + | chr2  | 69876967  | 69880463  | Ensembl   | NM_177376          |
| uc007zfw.1            | 2.76 | 0.018  | 4098   | - | chr16 | 42725814  | 42875693  | UCSC_kg   | NM_00103314        |
| uc007ocn.1            | 2.75 | 0.046  | 4628   | + | chr12 | 82732355  | 82768538  | UCSC_kg   | 9                  |
| ENSMUST00000117166    | 2.68 | 0.010  | 1344   | - | chr2  | 6053253   | 6055002   | Ensembl   |                    |
| uc008uju.1            | 2.67 | 0.025  | 6387   | - | chr4  | 118035347 | 118056021 | UCSC_kg   | NM_026601          |
| uc008uju.1            | 2.67 | 0.025  | 6387   | - | chr4  | 118035347 | 118056021 | UCSC_kg   | NM_198170          |
| AK136349              | 2.63 | 0.021  | 1102   | - | chr10 | 68797903  | 68799006  | fantom3   |                    |
| MM9LINC RNAEXON11230- | 2.62 | 0.002  | 885    | - | chr17 | 66831155  | 66832040  | lincRNA   |                    |
| uc008sir.1            | 2.61 | 0.006  | 1112   | - | chr4  | 41401422  | 41411881  | UCSC_kg   | NM_025539          |
| uc008sir.1            | 2.61 | 0.006  | 1112   | - | chr4  | 41401422  | 41411881  | UCSC_kg   | NM_024241          |
| uc008uxa.1            | 2.61 | 0.030  | 1747   | - | chr4  | 129118294 | 129124212 | UCSC_kg   |                    |
| ENSMUST00000121946    | 2.59 | 0.043  | 2902   | - | chr6  | 38492302  | 38496074  | Ensembl   |                    |
| ENSMUST00000152745    | 2.59 | 0.050  | 1261   | + | chr5  | 23356414  | 23360742  | Ensembl   |                    |
| AK135697              | 2.53 | 0.029  | 2877   | + | chr10 | 112412677 | 112465278 | fantom3   |                    |
| mouselincRNA0154+     | 2.48 | 0.043  | 5300   | + | chr10 | 24333365  | 24338665  | lincRNA   |                    |
| AK014021              | 2.48 | 0.040  | 1294   | + | chr2  | 109858118 | 110013517 | lincRNA   | NM_026613          |
| mouselincRNA1616+     | 2.46 | 0.017  | 9450   | + | chrX  | 45398900  | 45408350  | lincRNA   |                    |
| uc008atc.1            | 2.43 | 0.009  | 270    | + | chr17 | 23873321  | 23873696  | UCSC_kg   | NM_023058          |
| uc008atc.1            | 2.43 | 0.009  | 270    | + | chr17 | 23873321  | 23873696  | UCSC_kg   | NM_023824          |
| ENSMUST00000166061    | 2.42 | 0.020  | 1153   | - | chr4  | 145914739 | 145915894 | Ensembl   |                    |
| ENSMUST00000165496    | 2.42 | 0.038  | 289    | + | chr12 | 108657350 | 108657639 | Ensembl   |                    |
| ENSMUST00000152660    | 2.42 | 0.016  | 300    | + | chr8  | 71144036  | 71144336  | Ensembl   | NM_172753          |
| MM9LINC RNAEXON11665+ | 2.41 | 0.013  | 1574   | + | chr12 | 33824347  | 33825921  | lincRNA   |                    |
| uc007kde.1            | 2.41 | 0.029  | 863    | + | chr11 | 74986061  | 74991135  | UCSC_kg   | NM_027136          |
| ENSMUST00000165118    | 2.40 | 0.023  | 1153   | - | chr4  | 146460094 | 146461249 | Ensembl   | NM_027285          |
| uc009bpx.1            | 2.40 | 0.030  | 734    | + | chr6  | 41493458  | 41498351  | UCSC_kg   |                    |
| AK131677              | 2.37 | 0.038  | 631    | + | chr13 | 24853436  | 24854065  | fantom3   | NM_020567          |
| AK090241              | 2.34 | 0.021  | 2526   | - | chr16 | 25943095  | 25945619  | fantom3   |                    |
| MM9LINC RNAEXON10457- | 2.34 | 0.046  | 197    | - | chr6  | 67213651  | 67213848  | lincRNA   |                    |
| ENSMUST00000117910    | 2.33 | 0.048  | 477    | - | chr2  | 4755181   | 4755658   | Ensembl   |                    |
| AK007126              | 2.33 | 0.042  | 413    | + | chr12 | 92208388  | 92209958  | fantom3   |                    |
| ENSMUST00000084861    | 2.31 | 0.023  | 1091   | + | chr4  | 145632856 | 145633949 | Ensembl   |                    |
| ENSMUST00000120764    | 2.27 | 0.017  | 505    | + | chr8  | 102584015 | 102584520 | Ensembl   |                    |
| uc009gft.1            | 2.25 | 0.004  | 2105   | - | chr7  | 31438730  | 31449988  | UCSC_kg   | NM_027999          |

|                      |      |       |      |   |            |           |           |           |                          |
|----------------------|------|-------|------|---|------------|-----------|-----------|-----------|--------------------------|
| MM9LINCRNAEXON10746- | 2.25 | 0.022 | 1505 | - | chr4       | 124288832 | 124290337 | lincRNA   |                          |
| ENSMUST00000166606   | 2.25 | 0.002 | 698  | + | chr5       | 100406704 | 100407877 | Ensembl   | NM_007516<br>NM_00107726 |
| ENSMUST00000166606   | 2.25 | 0.002 | 698  | + | chr5       | 100406704 | 100407877 | Ensembl   | 6<br>NM_00107726         |
| ENSMUST00000166606   | 2.25 | 0.002 | 698  | + | chr5       | 100406704 | 100407877 | Ensembl   | 7<br>NM_00107726         |
| ENSMUST00000166606   | 2.25 | 0.002 | 698  | + | chr5       | 100406704 | 100407877 | Ensembl   | 5                        |
| uc007qbc.1           | 2.24 | 0.038 | 1033 | - | chr13      | 34176023  | 34205141  | UCSC_kg   | NM_00116292              |
| ENSMUST00000058584   | 2.24 | 0.020 | 4116 | + | chr15      | 60655895  | 60663348  | Ensembl   | 6                        |
| ENSMUST00000119302   | 2.21 | 0.041 | 1984 | + | chr1       | 67631626  | 67633610  | Ensembl   | RefSeq_                  |
| NR_028404            | 2.20 | 0.004 | 4330 | - | chrX       | 99261880  | 99266646  | NR        | NM_183318                |
| NR_028404            | 2.20 | 0.004 | 4330 | - | chrX       | 99261880  | 99266646  | RefSeq_   | NM_00116361              |
| uc009kdq.1           | 2.19 | 0.030 | 1463 | - | chr7       | 141376578 | 141423814 | NR        | 0                        |
| AK051578             | 2.18 | 0.017 | 3037 | + | chr1       | 91826835  | 91829865  | UCSC_kg   | NM_007400                |
| AK020521             | 2.16 | 0.011 | 388  | + | chr2       | 70550040  | 70550427  | phantom3  | NM_010262                |
| ENSMUST00000162565   | 2.16 | 0.047 | 867  | + | chr2       | 93292976  | 93296878  | phantom3  | NM_00113605              |
| ENSMUST00000162565   | 2.16 | 0.047 | 867  | + | chr2       | 93292976  | 93296878  | Ensembl   | 5                        |
| uc008wvu.1           | 2.15 | 0.028 | 1482 | + | chr5       | 30969274  | 30977199  | Ensembl   | NM_007656                |
| humanlincRNA2338-    | 2.15 | 0.038 | 9701 | + | chr4       | 39054681  | 39064382  | UCSC_kg   | NM_007681                |
| ENSMUST00000116301   | 2.14 | 0.006 | 411  | + | chr11      | 58775313  | 58775724  | lincRNA   |                          |
| BX521937             | 2.14 | 0.035 | 530  | + | chr1       | 35034878  | 35035099  | Ensembl   |                          |
| AK201973             | 2.14 | 0.031 | 221  | + | chr1       | 91828299  | 91828518  | lincRNA   | NM_010262                |
| AK142421             | 2.13 | 0.011 | 3373 | - | chr4       | 144999190 | 145002564 | NRED      |                          |
| ENSMUST00000141637   | 2.12 | 0.050 | 512  | + | chr4       | 84387378  | 84388195  | phantom3  |                          |
| ENSMUST00000121775   | 2.10 | 0.020 | 661  | - | chr11      | 40236195  | 40236856  | Ensembl   |                          |
| uc.461+              | 2.10 | 0.010 | 397  | - | chrX       | 90703238  | 90703635  | Ensembl   |                          |
| AK076567             | 2.06 | 0.019 | 910  | - | chr1       | 9657495   | 9658406   | UCR       | NM_008892                |
| uc007gnh.1           | 2.05 | 0.050 | 483  | + | chr10      | 85391518  | 85408951  | phantom3  | NM_00116361              |
| uc007gnh.1           | 2.05 | 0.050 | 483  | + | chr10      | 85391518  | 85408951  | UCSC_kg   | 4                        |
| AK033479             | 2.05 | 0.027 | 3562 | - | chr1       | 146867202 | 146870764 | UCSC_kg   | NM_145422                |
| AK041010             | 2.04 | 0.017 | 1086 | + | chr4       | 32326403  | 32327486  | phantom3  |                          |
| uc007dkt.1           | 2.04 | 0.018 | 4316 | + | chr4       | 32326403  | 32327486  | predicted |                          |
| uc007dkt.1           | 2.04 | 0.018 | 4316 | + | chr1       | 168931605 | 169021141 | d         | NM_00116026              |
| uc007dkt.1           | 2.04 | 0.018 | 4316 | + | chr1       | 168931605 | 169021141 | UCSC_kg   | 2                        |
| ENSMUST00000119909   | 2.03 | 0.017 | 387  | - | chr2       | 165750765 | 165751341 | UCSC_kg   | NM_175461<br>NM_00116026 |
| ENSMUST00000168749   | 2.03 | 0.035 | 1091 | - | chr4_rando | 41109     | 42202     | UCSC_kg   | 1                        |
| MM9LINCRNAEXON11621+ | 2.02 | 0.039 | 2759 | + | chr13      | 98280390  | 98283149  | Ensembl   |                          |
| ENSMUST00000119135   | 2.02 | 0.039 | 1371 | + | chr7       | 48745720  | 48747091  | lincRNA   | NM_00103353              |
| AW557181             | 2.02 | 0.005 | 487  | + | chr1_rando | 31011     | 31498     | Ensembl   | 0                        |
| ENSMUST00000129696   | 2.01 | 0.025 | 639  | + | m          | 31011     | 31498     | lincRNA   |                          |
| AK143705             | 2.00 | 0.033 | 2611 | + | chr1       | 38364746  | 38368775  | Ensembl   | NM_010678                |
|                      |      |       |      | + | chr10      | 96114479  | 96117090  | phantom3  |                          |

The table contains the following information about the DE downregulated lncRNAs: Sequence name (the sequence identifier of the lncRNA), FC (Absolute Fold change is the absolute ratio (no log scale) of normalized intensities between two conditions), p-val (P-value, P-value calculated from t-test), length (RNA length), Chr (chromosome), S

(DNA strand), Start and End (coding or non-coding genome location), , Source of the collection and Associated gene IS (the Accession number of the associated coding gene to the lncRNA).

\* Source of LncRNA collection:

- RefSeq\_NR: RefSeq validated non-coding RNA
- UCSC\_kg: UCSC known genes annotated as "non-coding", "near-coding" and "antisense" (<http://genome.ucsc.edu/cgi-bin/hgTables/>)
- lincRNA: lincRNA identified by John Rinn's group (Guttman et al. 2009; Khalil et al. 2009)

\* Source of LncRNA collection:

- RefSeq\_NR: RefSeq validated non-coding RNA
- UCSC\_kg: UCSC known genes annotated as "non-coding", "near-coding" and "antisense" (<http://genome.ucsc.edu/cgi-bin/hgTables/>)
- Ensembl: Ensembl (<http://www.ensembl.org/index.html>)
- Fantom3: Fantom project (<http://fantom.gsc.riken.jp/>)
- RNADB: RNADB2.0 (<http://research.imb.uq.edu.au/rnadb/>)
- NRED: NRED (<http://jrm-research.imb.uq.edu.au/nred/cgi-bin/ncrnadb.pl>)
- UCR: "ultra-conserved region" among human, mouse and rat (<http://users.soe.ucsc.edu/~jill/ultra.html>)
- lincRNA: lincRNA identified by John Rinn's group (Guttman et al. 2009; Khalil et al. 2009)
