# Supplementary material for: Fibrogenic Activity of MECP2 Is Regulated by Phosphorylation in Hepatic Stellate Cells
Source: PubMed Central journal article supplement (PMC6853276; doi:10.1053/j.gastro.2019.07.029), 2019-11
Supplement: mmc7.pdf [file mmc7.pdf]

**Supplementary Table 7. Quantitative PCR primers used for lncRNA corroboration and protein-coding RNAs validation.**

| <b>Gene Symbol</b> | <b>Sequence Name</b> | <b>Forward and reverse primer pair sequences</b> | <b>Anneal temp</b> | <b>bp product</b> |
|--------------------|----------------------|--------------------------------------------------|--------------------|-------------------|
| <b>AK080187</b>    | uc008hgf.1           | GAAGGGGGAAAACGGCAGTA                             | 57                 | 142               |
|                    |                      | TGCATTTTTGGGGACACCCT                             |                    |                   |
| <b>Has2</b>        | NM_008216            | AGTCCCTTGAAACCCCGATT                             | 57                 | 161               |
|                    |                      | GTCGTCTGAGTTCCCATCGA                             |                    |                   |
| <b>Myl7</b>        | NM_022879            | AGCTCGGGAGGGTAAGTGTT                             | 57                 | 112               |
|                    |                      | CCATTGAGCTTCTCCCCGAA                             |                    |                   |
| <b>Des</b>         | NM_010043            | CAAGGGCTCCTCGAGTTCAA                             | 57                 | 174               |
|                    |                      | AACTCCTGGTTCACAGCGTC                             |                    |                   |
| <b>Acan</b>        | NM_007424            | GAACTTGGCCATGGTCCTTC                             | 57                 | 161               |
|                    |                      | GGGTAAGCAGACAGGTCCTACT                           |                    |                   |
| <b>Cdk15</b>       | NM_001033373.2       | CAGAAGCATCCAGTTCCACG                             | 57                 | 128               |
|                    |                      | CCCCTGCCTCAGATTCTCTTC                            |                    |                   |
| <b>Tnxb</b>        | NM_031176.2          | CCAAGTCTGTCCCGAAGAC                              | 57                 | 223               |
|                    |                      | CGTCCTCTCTGGTTGCAGTT                             |                    |                   |
| <b>Sepp1</b>       | NM_009155            | TGACAGTGTGCGGAAAACCT                             | 57                 | 116               |
|                    |                      | GGCTGATTTTGTGAGGCAGC                             |                    |                   |
| <b>Ostn</b>        | NM_198112.2          | GCCACTGAGCTTTCGGCTAA                             | 57                 | 120               |
|                    |                      | GAGTCTGTCAAGGGGAGACC                             |                    |                   |
| <b>Has1</b>        | NM_008215.2          | TCTTTGCCCTGCTCATCCTG                             | 57                 | 122               |
|                    |                      | TAGGTGTGCGCTGAGGAATG                             |                    |                   |
| <b>Has3</b>        | NM_008217.4          | GCTTCTTTGTGTGGCGTAGC                             | 57                 | 189               |
|                    |                      | AGTCCACTGAGTTGCCAAGG                             |                    |                   |
| <b>Mcm6</b>        | NM_008567            | TGCTCACCCGAATCAGTGG                              | 57                 | 159               |
|                    |                      | CACACTGGATTTTCGGCAG                              |                    |                   |
| <b>Mcm5</b>        | NM_008566            | CATCCGGAGCTCGTACATCC                             | 57                 | 285               |
|                    |                      | GGGTCTCCCAACATCAGCAA                             |                    |                   |
| <b>Mcm4</b>        | NM_008565            | CCAATCGGAGACGTAGAGGC                             | 57                 | 281               |
|                    |                      | CACCTGCAAACCCTTTCGTG                             |                    |                   |
| <b>Mcm3</b>        | NM_008563            | CGAGGAGGACCAAGGCATTT                             | 57                 | 120               |
|                    |                      | AGGCGGTTAGCCCTCTTTTC                             |                    |                   |
| <b>Mcm2</b>        | NM_008564            | AAGTGTCTAGCCGTGCCATC                             | 57                 | 151               |
|                    |                      | TCGTCAATGAGACACACCCC                             |                    |                   |
| <b>Eme1</b>        | NM_177752            | GCAGTAGCAGTGAGGACGAA                             | 57                 | 178               |
|                    |                      | ATCTTTGGCCATGGTTGCCT                             |                    |                   |
| <b>Brip1</b>       | NM_178309            | CACTGTTTGTGAGAGTCC                               | 57                 | 188               |
|                    |                      | TCCAGGTTTGTGTCGCTGTAG                            |                    |                   |
| <b>Rad51</b>       | NM_011234            | AGGGTTCAACACAGACCACC                             | 57                 | 153               |
|                    |                      | TGCATTTGCCTGGCTGAAAG                             |                    |                   |
| <b>Ccna2</b>       | NM_009828            | TGTCCTGCTGGTCCCTCAT                              | 57                 | 157               |
|                    |                      | TCCGGGTAAAGAGACAGCTG                             |                    |                   |
| <b>Pold1</b>       | NM_011131            | ATTCTTGCCTGCTGGCACTCA                            | 57                 | 264               |
|                    |                      | TGGAAGGAGGAGTCACGGAT                             |                    |                   |

|                         |                |                           |    |     |
|-------------------------|----------------|---------------------------|----|-----|
| <b>Dna2</b>             | NM_177372      | GCGGAAAAATGGTCCCATGC      | 57 | 131 |
|                         |                | AGGTAACGGCTGCCTTGTTTC     |    |     |
| <b>Rpa2</b>             | NM_011284      | GAGTTCACCGCACACATCCT      | 57 | 154 |
|                         |                | GGCCATTTGCTGGCATGAAG      |    |     |
| <b>Col1a1<br/>(rat)</b> | NM_001145366.1 | CTGACTGGAAGAGCGGAGAG      | 58 | 113 |
|                         |                | CTGAGTGGGGAACACACAGG      |    |     |
| <b>TGFβ<br/>(rat)</b>   | NM_021578.2    | GACTCTCCACCTGCAAGACC      | 58 | 100 |
|                         |                | GGACTGGCGAGCCTTAGTTT      |    |     |
| <b>TIMP-1<br/>(rat)</b> | NM_053819.1    | TCTGGCATCCTCTTGTTGCT      | 58 | 100 |
|                         |                | TAACCAGGTCGAGTTGCAG       |    |     |
| <b>MMP13</b>            | NM_008607      | TGTTTGCAGAGCACTACTTGAA    | 60 | 132 |
|                         |                | CAGTCACCTCTAAGCCAAAGAAA   |    |     |
| <b>TNFα</b>             | NM_013693      | CCCTCACACTCAGATCATCTTCT   | 60 | 61  |
|                         |                | GCTACGACGTGGGCTACAG       |    |     |
| <b>IL-1b</b>            | NM_008361      | CAACCAACAAGTGATATTCTCCATG | 60 | 152 |
|                         |                | GATCCACACTCTCCAGCTGCA     |    |     |
| <b>IL-6</b>             | NM_031168      | TAGTCCTTCCCTACCCCAATTTCC  | 60 | 76  |
|                         |                | TTGGTCCTTAGCCACTCCTTC     |    |     |
| <b>MIP2α/<br/>CXCL2</b> | NM_009140      | CCAACCACCAGGCTACAGG       | 60 | 108 |
|                         |                | GCGTCACACTCAAGCTCTG       |    |     |
| <b>GAPDH</b>            | NM_008084      | GCACAGTCAAGGCCGAGAAT      | 57 | 151 |
|                         |                | GCCTTCTCCATGGTGGTGAA      |    |     |
| <b>βactin</b>           | NM_031144.3    | AGCCATGTACGTAGCCATCC      | 57 | 228 |
|                         |                | CTCTCAGCTGTGGTGGTGAA      |    |     |
